# Supplementary material for: Eosinophilic granulomatosis with polyangiitis exhibits T cell activation and IgG4 immune response in the tissue; comparison with IgG4-related disease
Source: HighWire-hosted journal article supplement (doi:10.1136/rmdopen-2021-002086), 2022-03-01
Supplement: rmdopen-2021-002086supp002_data_supplement.pdf [file rmdopen-2021-002086supp002_data_supplement.pdf]

**Table S1.** The 2020 Revised comprehensive diagnostic criteria for IgG4-RD

---

|                                                                                                                                                                  |
|------------------------------------------------------------------------------------------------------------------------------------------------------------------|
| 1. clinical and radiological features                                                                                                                            |
| One or more organs show diffuse or localized swelling or a mass or nodule characteristic of IgG4-RD.                                                             |
| In single organ involvement, lymph node swelling is omitted.                                                                                                     |
| 2. serological diagnosis                                                                                                                                         |
| Serum IgG4 levels greater than 135 mg/dl.                                                                                                                        |
| 3. pathological diagnosis                                                                                                                                        |
| Positivity for two of the following three criteria:                                                                                                              |
| (1) Dense lymphocyte and plasma cell infiltration with fibrosis.                                                                                                 |
| (2) Ratio of IgG4-positive plasma cells /IgG-positive cells greater than 40% and the number of IgG4-positive plasma cells greater than 10 per high powered field |
| (3) Typical tissue fibrosis, particularly storiform fibrosis, or obliterative phlebitis                                                                          |

---

Diagnosis:

Definite: 1) +2) +3)

Probable: 1) +3)

Possible: 1) +2)

---

**Table S2.** Differences between EGPA and IgG4-RD

|                              | p value |
|------------------------------|---------|
| Naive CD4 T cells            | 0.02    |
| Activated CD4 T cells        | 0.02    |
| Activated CD8 T cells        | 0.01    |
| Myeloid Dendritic cells      | <0.001  |
| Plasmacytoid Dendritic cells | <0.001  |
